# Supplementary material for: Interpretation of Measured Aerosol Mass Scattering Efficiency Over North America Using a Chemical Transport Model
Source: Copernicus journal article supplement (doi:10.5194/acp-2018-459), 2018-07-19
Supplement: Supplementary file [file acp-2018-459-AC1-supplement.pdf]

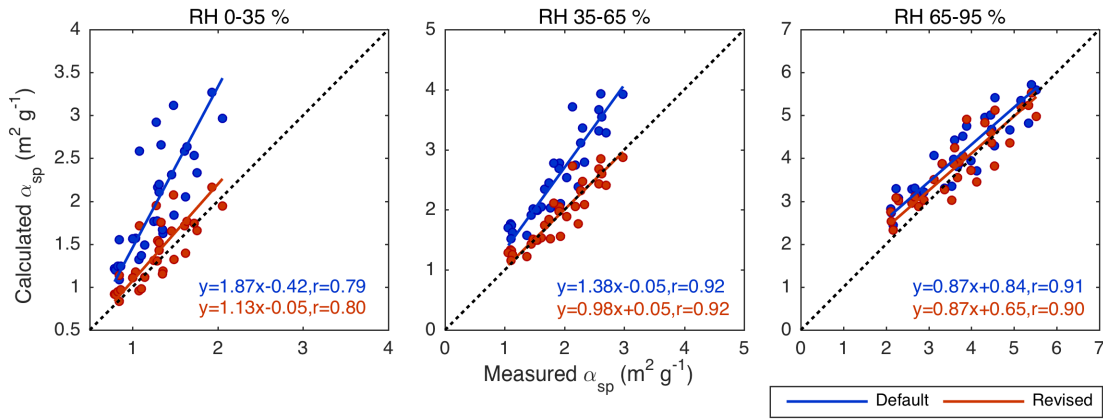

Figure 3: Average measured versus calculated  $\alpha_{sp}$  at IMPROVE sites using GEOS-Chem default and revised optical tables for measurements taken in 0-35 % RH, 35-65 % RH, and 65-95 % RH conditions. The 1:1 line is black. Slope, offset, and correlation coefficient are inset.

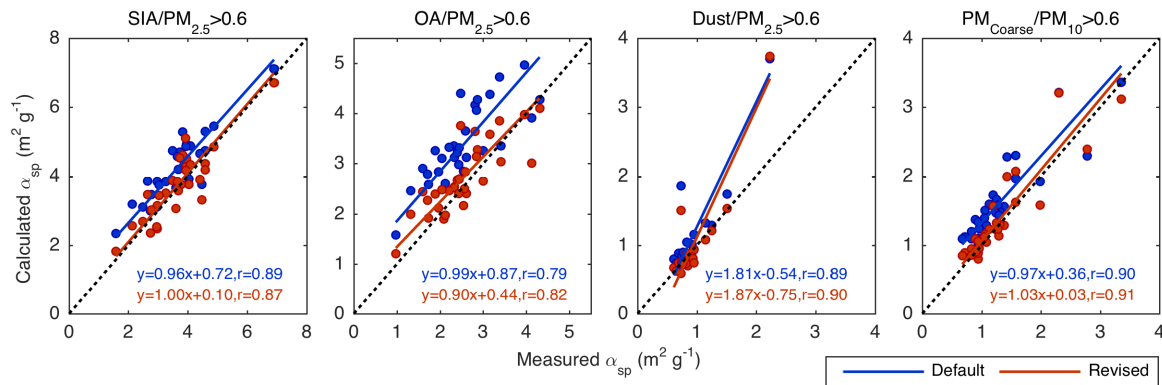

Figure 4: Average measured versus calculated  $\alpha_{sp}$  at IMPROVE sites using GEOS-Chem default and revised optical tables for measurements taken in SIA dominant conditions, OA dominated conditions, Dust dominant conditions, and  $\text{PM}_{\text{coarse}}$  dominated conditions. The 1:1 line is black. Slope, offset, and correlation coefficient are inset.

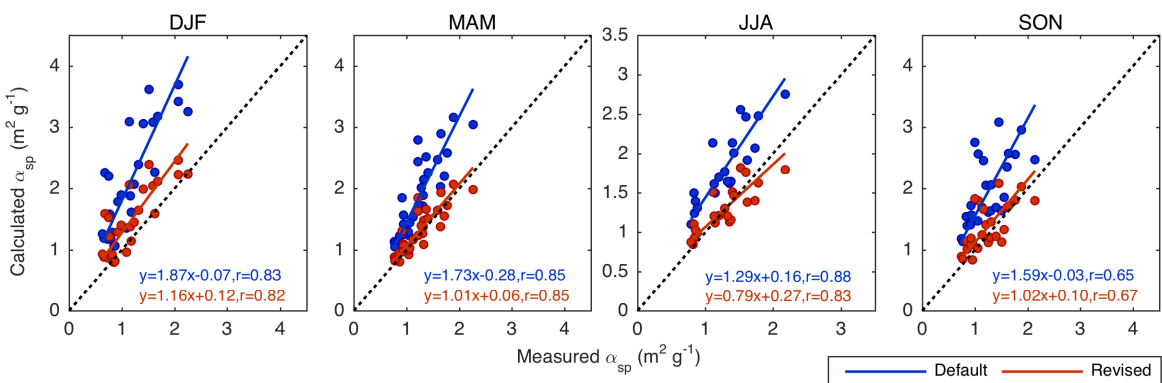

Figure 6: Average measured versus calculated  $\alpha_{sp}$  at IMPROVE sites using GEOS-Chem default and revised optical tables for measurements taken in dry conditions (RH < 35 %) in winter, spring, summer, and fall. The 1:1 line is black. Slope, offset, and correlation coefficient are inset.
